# Supplementary material for: Safety and Efficacy of 24-h Closed-Loop Insulin Delivery in Well-Controlled Pregnant Women With Type 1 Diabetes
Source: Oxford University Press journal article supplement (doi:10.2337/dc11-1430), 2011-10-20

## SUPPLEMENTARY DATA

### Supplementary Figure 1. Plasma glucose and plasma insulin concentrations during closed-loop and conventional insulin pump therapy

Top panel: Plasma glucose concentration. Bottom panel: Plasma insulin concentration.

Red lines represent the median plasma glucose levels and insulin infusion rates during closed-loop, and grey lines represent the median plasma glucose levels and insulin infusion rates during conventional insulin pump therapy.

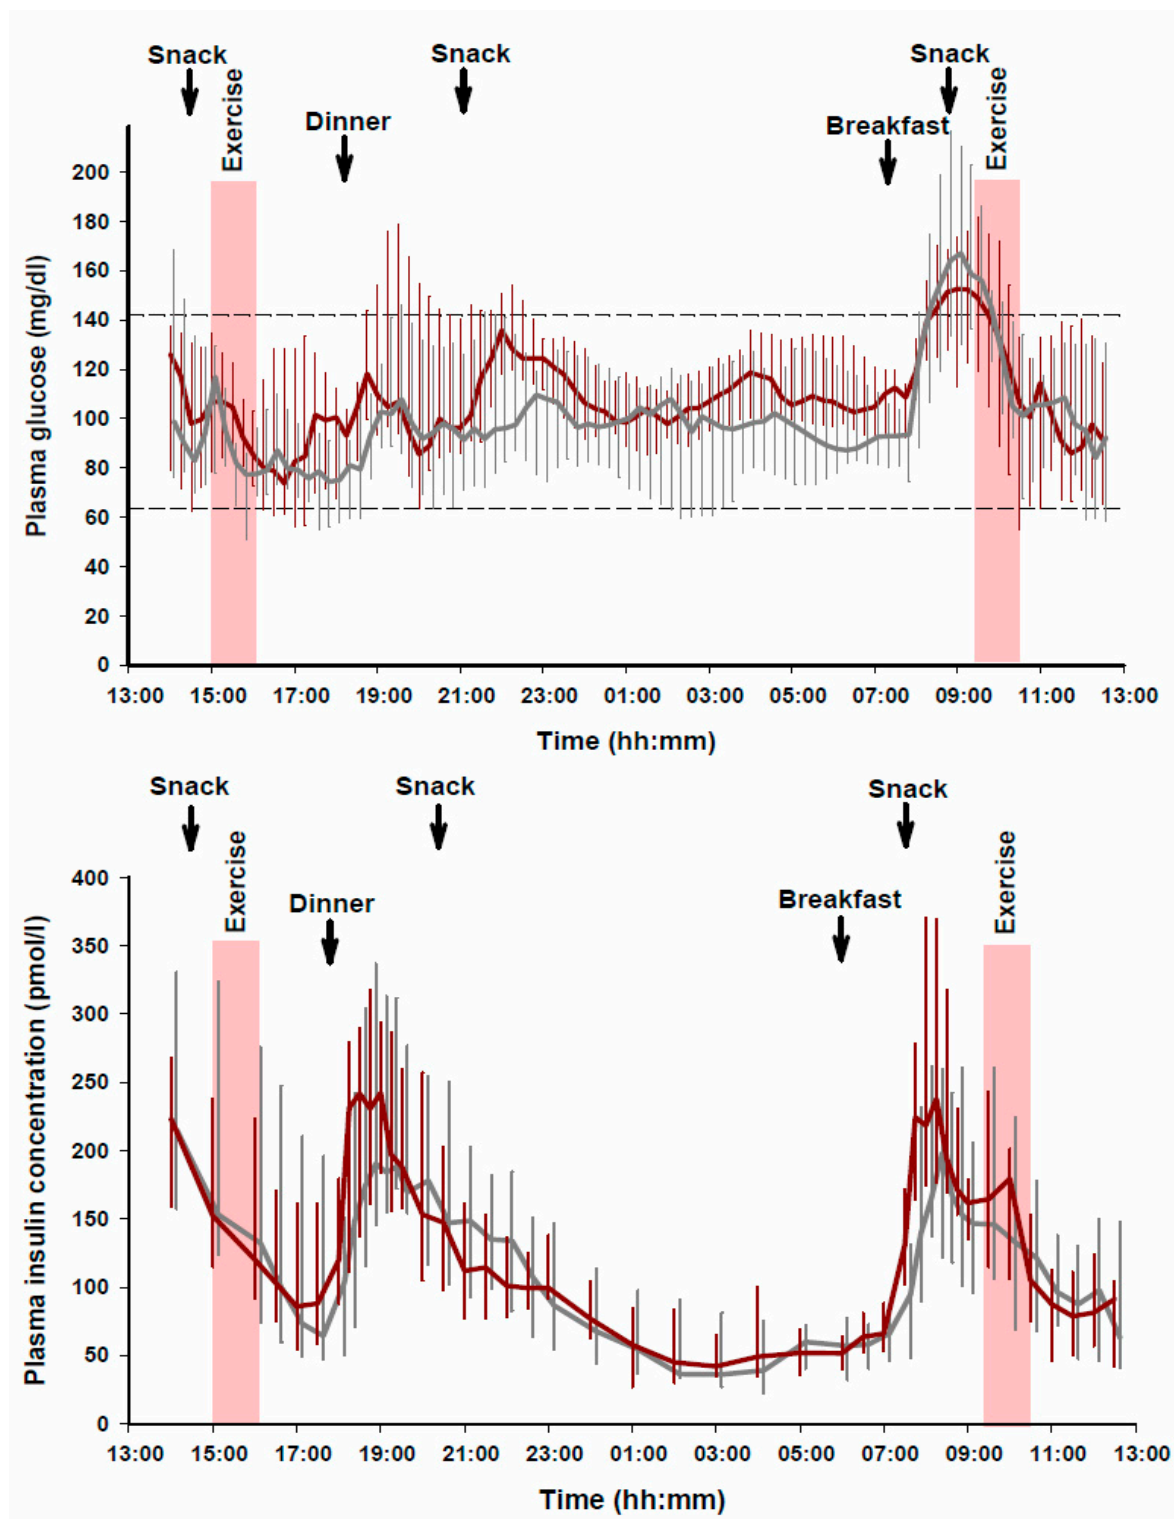

Supplement: dc111430supplementarydata.pdf [file dc111430supplementarydata.pdf]
